# Supplementary material for: Somatic structural variation targets neurodevelopmental genes and identifies SHANK2 as a tumor suppressor in neuroblastoma
Source: HighWire-hosted journal article supplement (doi:10.1101/gr.252106.119), 2020-08-13
Supplement: Supplemental_Table_S6.xlsx [file Supplemental_Table_S6.xlsx]

## Sheet: shortlist_supp_6
Supplemental Table S6. Orthogonally identified recurrently altered genes. List of 77 genes disrupted by structural variants (SVs) with alignment (SJ-BP) and read-depth (RD-BP) based evidences from the WGS dataset.
Gene and loci information						SJ-BP analyss of recurrently altered genes																	RD-BP analyss of recurrently altered genes									CN-BP analyss of recurrently altered genes									Rankings
HGNC	loci	seqnames	start	end	strand	exonic	copy number change	coding (exonic + copy number)	proximal	intronic	non.coding (proximal + intronic)	all (coding _ non-coding)	deletion	interchromosomal	complex	tandem.duplication	distal.duplication	probable.inversion	inversion	distal.duplication.by.mobile.element	coding samples	non-coding samples	coding WGS	proximal_WGS	coding+proximal WGS	coding WGS samples	proximal WGS samples	amplified WGS	amplified WGS samples	deep deletion WGS	deep deletion WGS samples	coding SNP	proximal SNP	coding+proximal SNP	coding SNP samples	proximal SNP samples	amplified SNP	amplified SNP samples	ddel SNP	ddel SNP samples	Orthogonal Rank	SJ-BP + RD-BP + CN-BP combined	SJ-BP + RD-BP combined (shortlist)
MYCNUT	MYCN	chr2	16060520	16076140	+	18	25	31	33	13	33	37	56	4	280	54	25	43	0	0	PAPTFZ PAPUTN PAPZYZ PARETE PARIKF PARIRD PARNEE PASWYR PASXIE PATESI PAPTLV PAPUNH PARDYU PASHFA PATGWT PASNZU PAPTIP PARSRJ PAIVZR PASJYB PATHVK PAPTLY PARHAM PAPWUC PATDXC PASSRN PATGLU PAPZYP PASVRU PAPTMM PAPCTS	PAIVZR PAPCTS PAPSEI PAPTFZ PAPTIP PAPTLV PAPTLY PAPTMM PAPUNH PAPUTN PAPVFD PAPZYP PAPZYZ PARDYU PARETE PARIKF PARIRD PARNEE PARSRJ PASHFA PASJYB PASNZU PASSRN PASVRU PASWYR PASXIE PASXRG PATESI PATFXV PATHVK PARNTS PATGWT PARABN	1	11	11	PARIKF	PARABN PAPTMM PAPVFD PASHFA PAPTFZ PARNTS PAPUTN PAPZYZ PARSRJ PASXIE PARIKF	30	PAIVZR PAPCTS PAPSEI PAPTFZ PAPTIP PAPTLV PAPTLY PAPTMM PAPUNH PAPUTN PAPZYP PAPZYZ PARABN PARDYU PARETE PARIRD PARNEE PARNTS PARSRJ PASHFA PASJYB PASNZU PASSRN PASVRU PASWYR PASXIE PASXRG PATESI PATFXV PATGWT	0	0	5	36	36	PAPZWS PASFKX PADNXC PALPIA PATRGW	PASLCD PARYVD PASPGB PANLHI PARABN PALNHZ PALFXR PASUTC PAKIRR PALBFV PAMBAC PANKVF PATVZB PATDFU PAMTZV PAMEZH PAIXLY PASTVA PAUSFW PAMMFT PATRXC PANFVP PANUKV PATDXG PAIXCU PASWFB PALHHT PASCLP PALEEK PAPZWS PASFKX PADNXC PALPIA PATRGW PAMDAL PARUTX	79	PADPEY PADTJJ PAIWLL PAIWMI PAIWUR PAIXCU PAIXRK PAKGMY PAKHHB PAKIMK PAKIRR PAKLWT PAKMRM PAKNXW PAKPHB PAKRFK PAKRPD PAKTXL PAKVFT PAKYAY PALAKE PALBFV PALEEK PALEZI PALFPS PALFYS PALHTR PALJDX PALJPF PALJPX PALJZV PALKGL PALKUC PALLWA PALTYS PALVSG PALYEC PALYVF PALZRG PALZSL PALZZV PAMBAC PAMDAL PAMEZH PAMFBR PAMKZW PAMMMS PAMMTK PAMMWD PAMMXF PAMRAA PAMRHB PAMTZV PAMUTD PAMYCK PAMYGL PAMYXR …	0	0	25	135	37
MYCN	MYCN	chr2	16080559	16087129	+	11	26	29	33	3	33	37	58	5	278	53	10	43	0	0	PAPUTN PAPZYP PARETE PARIRD PARSRJ PASXIE PAPTMM PARNEE PASJYB PASNZU PATESI PAIVZR PASHFA PARIKF PATHVK PARDYU PAPTFZ PAPTLY PARHAM PAPWUC PATDXC PASSRN PATGLU PAPTLV PASWYR PAPTIP PASVRU PAPCTS PATGWT	PAIVZR PAPCTS PAPSEI PAPTFZ PAPTIP PAPTLV PAPTLY PAPTMM PAPUNH PAPUTN PAPVFD PAPZYP PAPZYZ PARDYU PARETE PARIKF PARIRD PARNEE PARSRJ PASHFA PASJYB PASNZU PASSRN PASVRU PASWYR PASXIE PATESI PATFXV PATHVK PARNTS PATGWT PARABN PASXRG	1	12	12	PAPTMM	PAPTMM PAPVFD PASHFA PAPTFZ PARNTS PAPUTN PAPZYZ PARSRJ PASXIE PARIKF PASXRG PAPZYP	30	PAIVZR PAPCTS PAPSEI PAPTFZ PAPTIP PAPTLV PAPTLY PAPUNH PAPUTN PAPZYP PAPZYZ PARABN PARDYU PARETE PARIKF PARIRD PARNEE PARNTS PARSRJ PASHFA PASJYB PASNZU PASSRN PASVRU PASWYR PASXIE PASXRG PATESI PATFXV PATGWT	0	0	2	29	29	PAMDAL PARUTX	PALFXR PALBFV PAMBAC PANKVF PATVZB PATDFU PAMTZV PAMEZH PAIXLY PASTVA PAUSFW PAMMFT PATRXC PANFVP PANUKV PATDXG PAIXCU PASWFB PALHHT PASCLP PALEEK PAPZWS PASFKX PADNXC PALPIA PATRGW PAMDAL PARUTX PATVTL	80	PADNXC PADPEY PADTJJ PAIWLL PAIWMI PAIWUR PAIXCU PAIXRK PAKGMY PAKHHB PAKIMK PAKIRR PAKLWT PAKMRM PAKNXW PAKPHB PAKRFK PAKRPD PAKTXL PAKVFT PAKYAY PALAKE PALBFV PALEEK PALEZI PALFPS PALFYS PALHTR PALJDX PALJPF PALJPX PALJZV PALKGL PALKUC PALLWA PALPIA PALTYS PALVSG PALYEC PALYVF PALZRG PALZSL PALZZV PAMBAC PAMEZH PAMFBR PAMKZW PAMMMS PAMMTK PAMMWD PAMMXF PAMRAA PAMRHB PAMTZV PAMUTD PAMYCK PAMYGL …	0	0	26	130	37
MYCNOS	MYCN	chr2	16076386	16082371	-	12	26	30	32	4	32	38	57	12	291	57	18	30	2	0	PAPUTN PAPZYP PARETE PARIRD PARSRJ PASXIE PAPTMM PARNEE PAPTLV PAPZYZ PASJYB PASNZU PAIVZR PASHFA PARIKF PATHVK PARDYU PAPTFZ PAPTLY PARHAM PAPWUC PATDXC PASSRN PATESI PATGLU PASWYR PAPTIP PASVRU PAPCTS PATGWT	PAPCTS PAPSEI PAPTFZ PAPTIP PAPTLV PAPTMM PAPUAR PAPUNH PAPUTN PAPZYP PAPZYZ PARDYU PARETE PARIKF PARIRD PARNTS PARSRJ PASHFA PASJYB PASNZU PASSRN PASVRU PASWYR PASXIE PASXRG PATESI PATFXV PAIVZR PAPTLY PASCKI PARABN PARNEE	1	10	10	PAPTMM	PARNTS PASXRG PAPZYP PAPZYZ PAPUTN PASNZU PAPSEI PARSRJ PARIKF PAPTMM	30	PAIVZR PAPCTS PAPSEI PAPTFZ PAPTIP PAPTLV PAPTLY PAPUNH PAPUTN PAPZYP PAPZYZ PARABN PARDYU PARETE PARIKF PARIRD PARNEE PARNTS PARSRJ PASHFA PASJYB PASNZU PASSRN PASVRU PASWYR PASXIE PASXRG PATESI PATFXV PATGWT	0	0	1	20	20	PAMDAL	PARUTX PANKVF PATVTL PASZGB PATVJX PAPHGF PALFXR PALZRG PARYVD PATXXF PATCEM PATMFL PAPSEI PANVAN PAPZWS PASFKX PADNXC PALPIA PATRGW PAMDAL	80	PADNXC PADPEY PADTJJ PAIWLL PAIWMI PAIWUR PAIXCU PAIXRK PAKGMY PAKHHB PAKIMK PAKIRR PAKLWT PAKMRM PAKNXW PAKPHB PAKRFK PAKRPD PAKTXL PAKVFT PAKYAY PALAKE PALBFV PALEEK PALEZI PALFPS PALFYS PALHTR PALJDX PALJPF PALJPX PALJZV PALKGL PALKUC PALLWA PALPIA PALTYS PALVSG PALYEC PALYVF PALZRG PALZSL PALZZV PAMBAC PAMEZH PAMFBR PAMKZW PAMMMS PAMMTK PAMMWD PAMMXF PAMRAA PAMRHB PAMTZV PAMUTD PAMYCK PAMYGL …	0	0	26	126	38
GACAT3	MYCN	chr2	16190548	16225811	+	23	27	31	31	16	31	37	54	13	343	60	22	43	2	0	PAPTIP PAPUTN PAPZYP PAPZYZ PARDYU PARETE PARIKF PARIRD PARSRJ PASNZU PASVRU PATESI PASSRN PASWYR PAPCTS PAPTFZ PAPTLY PAPUNH PASHFA PASJYB PATFXV PATHVK PARABN PAIVZR PARHAM PAPWUC PATDXC PATGLU PAPTLV PAPTMM PATGWT	PAIVZR PAPCTS PAPSEI PAPTFZ PAPTIP PAPTLV PAPTMM PAPUAR PAPUNH PAPUTN PAPZYP PAPZYZ PARDYU PARETE PARIKF PARIRD PARNTS PARSRJ PASHFA PASJYB PASNZU PASSRN PASVRU PASWYR PASXIE PASXRG PATESI PATFXV PAPTLY PASCKI PARABN	6	11	13	PASXIE PAPUTN PATESI PATHVK PARIRD PAPTIP	PARNTS PASXRG PAPZYP PAPZYZ PAPUTN PASNZU PAPSEI PARSRJ PASXIE PATESI PATHVK	24	PAIVZR PAPCTS PAPTFZ PAPTLV PAPTLY PAPTMM PAPUNH PAPZYP PAPZYZ PARABN PARDYU PARETE PARIKF PARNEE PARNTS PARSRJ PASHFA PASJYB PASNZU PASSRN PASVRU PASWYR PATFXV PATGWT	0	0	6	17	18	PANVAN PALJPF PALUVT PAMPFJ PANVFA PAMZYP	PANKVF PATVTL PASZGB PATVJX PAPHGF PALFXR PALZRG PARYVD PATXXF PATCEM PATMFL PAPSEI PANVAN PALJPF PALUVT PAMPFJ PANVFA	79	PADNXC PADPEY PADTJJ PAIWLL PAIWMI PAIWUR PAIXCU PAIXRK PAKGMY PAKHHB PAKIMK PAKIRR PAKLWT PAKMRM PAKNXW PAKPHB PAKRFK PAKRPD PAKTXL PAKVFT PAKYAY PALAKE PALBFV PALEEK PALEZI PALFPS PALFYS PALHTR PALJDX PALJPX PALJZV PALKGL PALKUC PALLWA PALPIA PALTYS PALVSG PALYEC PALYVF PALZSL PALZZV PAMBAC PAMEZH PAMFBR PAMKZW PAMMMS PAMMTK PAMMWD PAMMXF PAMRAA PAMRHB PAMTZV PAMUTD PAMYCK PAMYGL PAMYXR PAMZCE …	0	0	28	126	38
NBAS	MYCN	chr2	15307031	15701472	-	18	2	18	20	12	21	24	31	2	269	33	32	45	10	0	PAIVZR PAPCTS PAPTFZ PAPTIP PAPTLY PAPZYP PARDYU PARIKF PARIRD PASHFA PASJYB PASNZU PASWYR PATESI PATGWT PATHVK PARETE PARNEE	PAIVZR PAPCTS PAPTFZ PAPTIP PAPTLY PAPUNH PAPUTN PAPZYP PARIRD PASHFA PASJYB PASNZU PASSRN PASWYR PASXRG PATESI PATGWT PAPWUC PARHAM PARDYU PARIKF	13	7	18	PASHFA PARIRD PASJYB PARABN PARDYU PATGWT PAPZYP PASWYR PARIKF PAPTIP PATESI PATHVK PAPTFZ	PASXRG PAPTLY PAPZYP PAPUNH PAPUTN PASSRN PAPTFZ	5	PAIVZR PAPCTS PAPTLY PARNEE PASNZU	0	0	57	24	78	PARUTX PALYEC PAMMWD PANPHU PASJYB PARIRD PADTJJ PARYSR PATNPW PANBCI PANVFA PAMBYG PANLSG PAPJAC PAKNMK PAMCXF PASEJZ PARABN PALJZV PAMYGL PANCDC PASMET PATXXF PAMYCK PALBUY PAIWLL PAINRC PALTYS PASDZJ PATIHB PATXWS PAMDAL PAMMXF PAMYXR PALZRB PAPGJR PASPDJ PASYYM PATPYK PATSVA PATXDV PAIXRK PARIKF PASWCY PALWVX PATKPD PANDGA PAPTIP PARJTB PASUEA PASYIP PAUFPG PATTPC PATYWM PAUMMZ PATMSR PATUWE	PAKRFK PANHRZ PAPBJE PASCWD PAUTLP PASZYY PAUAHC PADLKJ PAPUNH PAKMRM PAPUTN PALKGL PALLWA PAPSMC PARUTX PAIWMI PALFPS PALGWY PASSFV PATTPL PALJDX PANANV PATMSR PATUWE	27	PADPEY PAIWUR PAKGMY PAKIMK PAKPHB PAKRPD PALAKE PALEZI PALFYS PALHTR PALJPF PALJPX PALKUC PALVSG PALYVF PALZRG PALZSL PAMKZW PAMMTK PAMRAA PAMUTD PAMZGT PANATD PANCYF PANIPC PANZHU PAPCTS	0	0	18	119	25
LINC01804	MYCN	chr2	15830905	15859085	+	15	19	24	21	8	21	25	25	4	136	42	7	27	4	0	PAIVZR PAPTFZ PAPUNH PAPUTN PARIKF PARIRD PARNEE PASJYB PASNZU PASSRN PAPZYP PARDYU PASWYR PATESI PAPCTS PARETE PASHFA PATHVK PATGWT PAPTLY PARHAM PAPWUC PATDXC PAPTIP	PAIVZR PAPCTS PAPTFZ PAPTIP PAPTLY PAPUNH PAPUTN PAPZYP PARDYU PARETE PARIRD PASJYB PASNZU PASSRN PASWYR PATESI PATGWT PARIKF PARNEE PASHFA PASXRG	0	6	6	0	PAPZYP PAPUNH PAPUTN PASSRN PARDYU PARNEE	19	PAIVZR PAPCTS PAPTFZ PAPTIP PAPTLY PAPUNH PAPUTN PARDYU PARIKF PARIRD PARNEE PASHFA PASJYB PASNZU PASSRN PASWYR PASXRG PATESI PATGWT	0	0	12	35	36	PATVGK PAKRFK PATCEM PAIULB PAMJED PAKPXX PATEXL PAIBIW PANLKY PAMMMS PATVJX PASKKZ	PAUAHC PADLKJ PAPUNH PAKMRM PAPUTN PALKGL PALLWA PAPSMC PARUTX PAIWMI PALFPS PALGWY PASSFV PATTPL PALJDX PANANV PATJZF PAUGRP PALUVT PASFDM PAMZCE PATVDP PAMYXR PAMZGK PATVGK PAKRFK PATCEM PAIULB PAMJED PAKPXX PATEXL PAIBIW PANLKY PAMMMS PATVJX	59	PADPEY PADTJJ PAIWLL PAIWMI PAIWUR PAIXRK PAKGMY PAKHHB PAKIMK PAKMRM PAKPHB PAKRPD PAKTXL PAKVFT PAKYAY PALAKE PALEZI PALFPS PALFYS PALHTR PALJDX PALJPF PALJPX PALJZV PALKGL PALKUC PALLWA PALTYS PALVSG PALYEC PALYVF PALZRG PALZSL PALZZV PAMBAC PAMDAL PAMFBR PAMKZW PAMMTK PAMMWD PAMMXF PAMRAA PAMUTD PAMYCK PAMYGL PAMZCE PAMZGK PAMZGT PAMZZZ PANATD PANAYF PANCYF PANDGA PANIPC PANWBG PANZHU PAPBJE …	0	0	17	104	25
FAM49A	MYCN	chr2	16730726	16847134	-	16	12	19	13	9	16	21	21	7	50	30	6	35	2	0	PAPSEI PAPTFZ PAPZYP PAPZYZ PARIKF PARIRD PARSRJ PASWYR PARDYU PAIVZR PAPTLV PAPTLY PARACM PASHFA PATESI PATHVK PAPTMM PARNEE PATGWT	PAPTLY PAPZYZ PARIKF PARIRD PARNEE PARNTS PARSRJ PASWYR PAPSEI PASWIJ PATESI PARDYU PAPTMM PAPTFZ PAIVZR PATGWT	6	4	8	PAIVZR PARSRJ PAPSEI PAPTLV PASHFA PARACM	PAPTMM PARIKF PASHFA PARACM	11	PAPTLY PAPTMM PAPZYZ PARDYU PARIKF PARIRD PARNEE PARNTS PASWYR PATESI PATGWT	0	0	33	26	52	PALZRB PAMMXF PATWTW PANVAN PAMTZV PAPJAC PATJHU PAPEJW PASPGB PANKVF PAIVZR PATISU PATVZB PALJDX PAISSH PANDGA PASCWD PATRMB PAPSEI PAUGRP PASTGD PAUAHC PATTPC PALJZV PAMZGK PAMPFJ PAMZCE PAUKLK PAMMMS PAIWLL PAIWMI PASDZJ PAKIRR	PALFXR PAMXGF PASZYY PASMET PARRBU PALAKE PATVDP PAMBYG PAMRHB PARIKF PAISSH PASUEA PASPDJ PALLWA PANKVF PALNHZ PAPKWN PALUVT PASUBM PAMUTD PATPYK PAUKLK PAIWLL PAIWMI PASDZJ PAKIRR	31	PADPEY PADTJJ PADUYJ PAIXCU PAIXRK PAKGMY PAKLWT PAKPHB PALAKE PALBFV PALFYS PALJPX PALKGL PALLWA PALVSG PALYEC PALZZV PAMBAC PAMFBR PAMKZW PAMRAA PAMRHB PAMUTD PAMZGT PAMZMG PANAKY PANATD PANBCI PANCYF PANFVP PAPEVV	0	0	16	93	21
DDX1	MYCN	chr2	15731744	15771235	+	15	12	18	16	5	16	19	16	1	83	22	14	23	4	0	PAPTFZ PAPUNH PAPZYP PARIRD PASNZU PASWYR PATESI PATGWT PAIVZR PAPTLY PASHFA PAPCTS PAPTIP PASJYB PARIKF PARETE PATHVK PARDYU	PAPCTS PAPTFZ PAPTIP PAPTLY PAPZYP PARIRD PASHFA PASJYB PASNZU PASWYR PASXRG PATESI PATGWT PARDYU PAIVZR PAPUNH	3	9	10	PAPZYP PAPUNH PAPUTN	PARDYU PAPTIP PATESI PATHVK PAPTFZ PASXRG PAPTLY PAPZYP PAPUNH	17	PAIVZR PAPCTS PAPTFZ PAPTIP PAPTLY PAPZYP PARDYU PARIKF PARIRD PARNEE PASHFA PASJYB PASNZU PASWYR PASXRG PATESI PATGWT	0	0	8	23	28	PAUAHC PADLKJ PAPUNH PAKMRM PAPUTN PALKGL PALLWA PAPSMC	PASWCY PALWVX PATKPD PANDGA PAPTIP PARJTB PASUEA PASYIP PAUFPG PATTPC PATYWM PAUMMZ PATMSR PATUWE PAKRFK PANHRZ PAPBJE PASCWD PAUTLP PASZYY PAUAHC PADLKJ PAPUNH	51	PADPEY PADTJJ PAIWLL PAIWUR PAIXRK PAKGMY PAKHHB PAKIMK PAKPHB PAKRFK PAKRPD PAKTXL PAKVFT PAKYAY PALAKE PALEZI PALFYS PALHTR PALJPF PALJPX PALJZV PALKUC PALTYS PALVSG PALYEC PALYVF PALZRG PALZSL PAMBAC PAMDAL PAMFBR PAMKZW PAMMTK PAMMWD PAMMXF PAMRAA PAMUTD PAMYCK PAMYGL PAMYXR PAMZGT PAMZZZ PANATD PANCYF PANDGA PANIPC PANWBG PANZHU PAPBJE PAPCTS PAPEVV	0	0	15	92	21
SHANK2	SHANK2	chr11	70313960	70935842	-	11	0	11	0	0	0	11	1	9	7	0	0	1	0	0	PARDCK PANLET PARVME PAPVXS PAPTAN PARSEA PASCKI PASNEF PASGUT PAMNLH PARUXY	0	11	0	11	PARDCK PANLET PARVME PAPVXS PARUXY PAPTAN PARSEA PASCKI PASNEF PASGUT PAMNLH	0	0	0	0	0	45	5	49	PAITZV PALGXF PADNFT PARJAR PARSBI PAKHCF PAKYZS PALTXM PAMIIU PAUFFP PAKSCM PANDHZ PAILNU PANYGR PAPUJU PAKANZ PALETP PALKNC PANLET PALBDS PARVME PACPJG PATINJ PAKUXT PAKZHI PALGDH PADPRJ PANGTS PAURPL PADSMF PAIMDS PASCKI PALIFG PARSEA PATLCM PATPFG PADKRU PADSXE PALPGL PAMKGY PAIXPL PATVSU PADPCI PAMNLH PASVUB	PALSMX PASESX PATKHS PAUNWR PASVUB	0	0	0	0	11	55	11
DLG2	DLG2	chr11	83166054	85338314	-	12	0	12	0	2	2	14	0	6	1	6	0	1	0	0	PARACM PAPVEB PASLGS PASUCB PARGDJ PASSRS PASCUF PASPER PARMTT PASEGA PASXRG PAPUWY	PARAMT PARGUX	13	0	13	PASCUF PASPER PATEPF PARMTT PASLGS PASEGA PASXRG PASUCB PARUXY PARGDJ PAPTLD PAPUWY PASSRS	0	0	0	0	0	28	0	28	PATWGC PADLPZ PAIWYH PATPET PALVKK PARDVT PAKFUY PATTPW PADRWY PAKGEJ PAIFXV PALWIP PANHVF PARMTT PASLGS PATRHD PAUBVN PACRZM PAMLMY PAKPJE PARGDJ PADLPR PAMXSL PATZRU PAPTLD PAMAPZ PALBAH PANRHJ	0	0	0	0	0	10	37	17
TERT	TERT	chr5	1253281	1295162	-	7	0	7	21	1	21	24	8	11	30	3	1	12	0	0	PAPUTN PARVME PARAMT PAPVXS PASTKC PATDXC PARSRJ	PARAMT PASATK PASCUF PARHYL PASNEF PAPSKM PARACM PARXLM PATEPF PAPVXS PASFGG PANNMS PAPTLD PARNCW PARMTT PATBMM PASCKI PATDXC PASBEN PAMNLH PAPUTN	2	14	14	PAPVXS PASTKC	PAPVXS PASTKC PAPUTN PARVME PASCUF PARHYL PASCKI PAPSKM PATEPF PANNMS PAPEAV PARMTT PASBEN PAMNLH	0	0	0	0	4	15	15	PALFDZ PALHVD PASGPY PAPUTN	PADIEY PASVUB PALWIP PAKPAL PAKVTK PALUKI PANEYM PATPPU PATRHD PAURZH PAITCI PALFDZ PALHVD PASGPY PAPUTN	0	0	0	0	12	28	25
PTPRD	PTPRD	chr9	8314245	10612723	-	15	0	15	0	7	7	20	20	1	0	5	0	1	0	0	PARDUJ PARBGP PATESI PARBLH PASUYG PATHVK PAMNLH PAREGK PAPSEI PARIKF PARAMT PASYPX PARKGJ PARAHE PARZIP	PASWIJ PAPVXS PANLET PAPSEI PASBEN PAMNLH PARYNK	12	0	12	PASUYG PARBGP PATESI PAPVXS PAMNLH PATHVK PARIKF PANLET PARZIP PARKGJ PASSRS PARAHE	0	0	0	0	0	11	0	11	PAIVHE PATRHD PALJFH PASGKP PATYPH PAIPGU PAMVAG PASMNT PANBLP PALRDI PALEVG	0	0	0	0	0	11	23	21
FAM84A	MYCN	chr2	14772806	14792040	+	0	3	3	1	0	1	3	1	0	0	3	0	1	0	0	PAPTLY PARNEE PAIVZR	PAPTLY	0	2	2	0	PASHFA PAPTLY	5	PAIVZR PAPTLY PARABN PARNEE PASHFA	0	0	1	8	8	PALUVT	PAIULB PAMZGT PATXKG PATKUK PAKRPD PATSRD PALNHR PALUVT	11	PADPEY PAKIMK PAKPHB PAKRPD PALJPX PALVSG PALYVF PAMRAA PAMUTD PAMZGT PANIPC	0	0	3	22	5
VSNL1	MYCN	chr2	17721806	17837706	+	3	2	4	2	2	3	4	3	0	25	2	1	4	0	0	PAPZYP PARDYU PARETE PARNEE	PAPZYP PARDYU PARNEE	2	1	2	PAPZYP PARDYU	PAPZYP	0	0	0	0	6	6	10	PALAKE PATSVA PAPEFE PAMUTD PALBUY PALKGL	PASPGB PALUVT PATCDJ PAIXRK PALAKE PATSVA	8	PAKIMK PAKPHB PALVSG PAMFBR PAMKZW PAMPFJ PAMZGT PANFVP	0	0	2	20	4
LINC00276	MYCN	chr2	14368997	14541082	-	5	2	5	2	0	2	5	5	0	8	2	2	2	0	0	PAIVZR PAPTLY PARNEE PARABN PATESI	PAIVZR PAPTLY	3	0	3	PATESI PARABN PAIVZR	0	2	PAPTLY PARNEE	0	0	4	3	6	PAPEFE PAIULB PAIVZR PATTMM	PALZRG PASZPI PATTMM	8	PADPEY PAKPHB PALJPX PALVSG PALYVF PAMRAA PAMUTD PANIPC	0	0	5	18	5
CACNA2D3	CACNA2D3	chr3	54156692	55108584	+	4	0	4	0	0	0	4	1	3	0	0	0	0	0	0	PASRFS PARDCK PARSRJ PAISNS	0	7	0	7	PASRFS PARDCK PARMTT PASWIJ PARSRJ PATEPF PAISNS	0	0	0	0	0	11	1	12	PALTXM PAKHHZ PARMTT PADSEC PADNFT PAMZYM PAUFUS PATINJ PALFIT PAISNS PALWVJ	PAUBDC	0	0	0	0	4	17	7
CLPTM1L	TERT	chr5	1317858	1345185	-	8	0	8	4	0	4	10	7	4	6	2	1	10	0	0	PASFGG PANNMS PAPTLD PARNCW PAPVXS PARMTT PARXLM PATBMM	PAPVXS PARXLM PARNTS PAMNLH	3	6	7	PANNMS PAPEAV PARMTT	PASBEN PAPVXS PAMNLH PARXLM PAPEAV PARMTT	0	0	0	0	4	7	10	PAKPAL PAKVTK PALUKI PANEYM	PATPPU PATRHD PAURZH PAITCI PAPSKM PASGKP PANEYM	0	0	0	0	5	17	12
NUMA1	NUMA1	chr11	71713909	71791739	-	2	0	2	1	0	1	3	0	1	2	1	0	0	0	0	PARFWB PARMFA	PAPTMM	3	2	3	PARFWB PASBEN PARMFA	PARMFA PASBEN	0	0	0	0	4	11	13	PAKGKH PALVFV PADNNX PAUEZU	PALFIT PATMPC PASBEN PAKJFU PANNMS PAUAIN PAPSSE PALLDC PAMVAG PADNNX PAUEZU	0	0	0	0	2	15	4
ALK	ALK	chr2	29415639	30144477	-	4	0	4	2	2	2	4	15	1	18	10	0	12	0	0	PARETE PARNTS PATDXC PARKGJ	PARETE PARNTS	2	0	2	PARAHE PARNTS	0	0	0	0	0	10	1	11	PAKPHB PALLDC PAPBFP PAIXVH PATSVA PALJVX PASEJZ PATXHT PANGTS PATXDV	PAKNXW	2	PAKNXW PAMKZW	0	0	1	14	5
ASIC2	ASIC2	chr17	31340104	32483825	-	3	0	3	0	0	0	3	0	3	0	0	0	0	0	0	PARSEA PAPTFZ PARMFA	0	4	1	5	PARSEA PAPTFZ PARMFA PAPKXS	PASATK	0	0	0	0	11	1	11	PARSEA PATSXC PAUBEC PAUAHC PAKNMK PAIXVH PAPKXS PARMFA PATMPC PALLDU PAMRAA	PAMRAA	0	0	0	0	3	13	5
DPYD	DPYD	chr1	97543298	98386615	-	2	0	2	3	3	6	7	2	1	3	4	0	1	0	0	PANRVJ PATHVK	PASUYG PASAZJ PARIRD PAISNS PAPVEB PATHVK	2	2	4	PAISNS PANRVJ	PASUYG PARIRD	0	0	0	0	6	2	8	PASCLP PASUTC PAUBSW PATYWM PALGWY PAKNXW	PAMVAG PASYYM	0	0	0	0	4	12	7
AGBL4	AGBL4	chr1	48998526	50489626	-	4	0	4	0	0	0	4	2	1	0	1	0	1	0	0	PARFWB PANRVJ PASCKI PANLET	0	6	1	6	PANRVJ PASCKI PASJYB PASATK PARHYL PANLET	PANLET	0	0	0	0	5	1	6	PAMAPZ PANRVJ PATXHT PATXDV PADLNM	PATEUC	0	0	0	0	3	11	7
KANSL1	KANSL1	chr17	44107281	44302740	-	2	0	2	0	1	1	3	1	2	0	0	0	1	0	0	PASUCB PARAHE	PASYPX	2	7	8	PAPTIP PARAHE	PAPTIP PANNMS PASJYB PASUYG PAPVXS PASATK PASGUT	0	0	0	0	4	0	4	PAMCXF PAPTIP PALNIE PALBUY	0	0	0	0	0	1	11	10
CLIP4	ALK	chr2	29320541	29406679	+	2	2	3	3	0	3	4	6	1	2	6	0	3	0	0	PARETE PASXRG PARNTS	PARETE PARNTS PAPKXS	0	0	0	0	0	2	PARETE PARNTS	0	0	3	3	6	PATLLI PATXDV PALJVX	PATYWM PAMMXF PANGTS	3	PAKNXW PAMKZW PANATD	0	0	2	11	4
NRXN1	NRXN1	chr2	50145642	51259674	-	5	0	5	0	2	2	6	2	1	1	4	0	0	0	0	PAREGK PARZIP PASXHE PATGWT PASJYB	PASJYB PATAYJ	3	0	3	PAREGK PARZIP PASJYB	0	0	0	0	0	10	0	10	PANCYF PAPSMC PAREGK PATCDJ PASJYB PALXVY PACPJG PATVJX PAKJBX PADPRJ	0	0	0	0	0	3	11	6
SLC6A18	TERT	chr5	1225469	1246304	+	6	0	6	7	0	7	10	2	7	36	1	0	7	0	0	PATEPF PAPVXS PARVME PAMNLH PARXLM PAPUTN	PAPUTN PARXLM PARACM PAMNLH PARSRJ PASBEN PASFGG	3	9	9	PATEPF PAPVXS PARVME	PAPSKM PARXLM PAMNLH PANNMS PASBEN PASCUF PATEPF PAPVXS PARVME	0	0	0	0	1	2	2	PALUYS	PADIEY PALUYS	0	0	0	0	6	11	13
EYS	EYS	chr6	64429875	66417118	-	6	0	6	0	1	1	6	1	0	3	2	0	1	0	0	PARDCK PAPTLD PASXHE PASTKC PARAHE PASATK	PASXHE	3	0	3	PAPTLD PASXHE PASTKC	0	0	0	0	0	7	1	8	PALTYS PASLGS PAPPKJ PAKFRB PATPPK PAPBFP PATVHB	PASSEC	0	0	0	0	3	11	6
LINC00854	LINC00910	chr17	41373436	41383336	-	2	0	2	10	0	10	11	0	3	13	0	0	0	0	0	PASWVY PATDXC	PAISNS PAPSKM PARDCK PASWVY PAPVFD PAREGK PARXLM PARIRD PARZHA PARAMT	1	7	7	PASWVY	PAPKXS PATGLU PAPSKM PAPZYP PARXLM PARAMT PASWVY	0	0	0	0	0	3	3	0	PAIMDS PAUPGV PADNNX	0	0	0	0	4	10	14
MACROD2	MACROD2	chr20	13976145	16033842	+	3	0	3	0	5	5	8	0	1	0	4	2	2	0	0	PAPTLD PATHVK PASGUT	PARAMT PATEPF PASTKC PAPVRN PARDYU	4	0	4	PASKJX PASTKC PATHVK PASSRS	0	0	0	0	0	7	0	7	PASKJX PAMFLZ PAMYBA PAUAIN PAICAK PALSAE PAMXSL	0	0	0	0	0	2	10	10
SLC25A3	ANKS1B	chr12	98987402	98995778	+	0	4	4	5	0	5	9	3	0	1	5	0	0	0	0	PAPTAN PASEGA PASVRU PANLET	PARDUJ PAPEAV PASUCB PASWYR PASYPX	0	4	4	0	PAPTLD PARACS PASVRU PASYPX	0	0	0	0	0	5	5	0	PARXXC PASKSR PALBFV PATVHB PAKPLH	0	0	0	0	1	9	11
SNORA53	ANKS1B	chr12	98993412	98993662	+	0	4	4	5	0	5	9	3	0	1	5	0	0	0	0	PAPTAN PASEGA PASVRU PANLET	PARDUJ PAPEAV PASUCB PASWYR PASYPX	0	4	4	0	PAPTLD PARACS PASVRU PASYPX	0	0	0	0	0	5	5	0	PARXXC PASKSR PALBFV PATVHB PAKPLH	0	0	0	0	1	9	11
MYO1D	MYO1D	chr17	30819539	31204191	-	4	0	4	0	0	0	4	0	2	2	0	0	0	0	0	PAPTAN PASWVY PASCUF PASKJX	0	2	1	3	PAPTAN PASWVY	PARNEE	0	0	0	0	6	0	6	PALVRB PARXXC PATPET PAMYXR PADKVV PATUEH	0	0	0	0	0	2	9	5
EFTUD2	EFTUD2	chr17	42927654	42976993	-	3	0	3	0	0	0	3	0	3	0	0	0	0	0	0	PAPUTN PASYPX PASGUT	0	3	5	6	PAPUTN PASYPX PASGUT	PASUYG PATEPF PAPTLD PASYPX PASGUT	0	0	0	0	2	4	5	PAIXNC PAPUTN	PAMPWJ PAPTLD PAMHMK PAPUTN	0	0	0	0	3	9	6
LINC01511	TERT	chr5	1363696	1380188	-	2	2	2	4	0	4	4	7	3	0	2	0	6	0	0	PAPVXS PARXLM	PAPVXS PARXLM PARNTS PARSRJ	1	3	3	PAMNLH	PARXLM PAPVXS PAMNLH	0	0	0	0	4	6	6	PATPPU PATRHD PAURZH PAITCI	PAPSKM PASGKP PATPPU PATRHD PAURZH PAITCI	0	0	0	0	2	9	5
AUTS2	AUTS2	chr7	69063904	70258054	+	9	0	9	0	7	7	15	10	2	4	1	0	0	0	0	PARSEA PASKJX PASUYG PAPUWY PASXRG PASATK PASYPX PAPTLD PASGAP	PASSRS PARBLH PARDUJ PASKJX PAPZYP PARIRD PARZCJ	6	0	6	PASKJX PASUYG PAPUWY PARAHE PARACS PASRFS	0	0	0	0	0	3	0	3	PARMFA PANYBL PADKFS	0	0	0	0	0	3	9	18
ATRX	ATRX	chrX	76760355	77041755	-	12	0	12	0	0	0	12	11	0	0	1	0	0	0	0	PASKJX PARUXY PARGUX PANLET PASYLD PAPKXS PASRFS PATNKP PATCFL PASTCN PATGLU PARYNK	0	6	2	6	PARACS PATGLU PANLET PAPKXS PATNKP PARYNK	PARACS PAPKXS	0	0	0	0	0	3	3	0	PAINLN PAREGK PARJTB	0	0	0	0	5	9	13
FCHSD2	FCHSD2	chr11	72547789	72853143	-	2	0	2	0	0	0	2	0	1	0	0	0	1	0	0	PASFGG PASPER	0	4	0	4	PAPVFD PASFGG PASTKC PASPER	0	0	0	0	0	2	2	4	PARIKT PATKSX	PAIJGC PALZBH	0	0	0	0	2	8	4
ANKS1B	ANKS1B	chr12	99128568	100378432	-	7	0	7	0	1	1	8	4	1	1	2	0	0	0	0	PARDIW PASEGA PATGLU PAPUWY PAPTAN PANLET PARDYU	PASHFA	3	0	3	PAPTAN PASWIJ PAPUWY	0	0	0	0	0	5	0	5	PATVHB PANTDT PARXXC PAKPLH PASKSR	0	0	0	0	0	2	8	9
NT5C1B	MYCN	chr2	18744136	18770846	-	2	3	3	2	1	2	3	6	0	17	5	2	3	0	0	PAPSEI PAPZYP PARBLH	PAPSEI PAPZYP	1	2	2	PAPZYP	PAPSEI PAPZYP	2	PAPSEI PARNEE	0	0	0	2	2	0	PANANV PAMBYG	3	PAKHHB PAMZGT PANFVP	0	0	2	8	4
SLC6A19	TERT	chr5	1201709	1225232	+	4	0	4	4	0	4	7	1	5	40	1	0	3	0	0	PAPUTN PARACM PARSRJ PASBEN	PAPUTN PARXLM PATDXC PAMNLH	3	7	7	PANNMS PASBEN PASCUF	PAPUTN PAPSKM PARXLM PAMNLH PANNMS PASBEN PASCUF	0	0	0	0	0	1	1	0	PADIEY	0	0	0	0	4	8	10
CNTNAP2	CNTNAP2	chr7	145813452	148118090	+	4	0	4	0	3	3	7	0	1	2	3	0	3	0	0	PASSRS PARAHE PARAMT PAPTFZ	PASTKC PATHVK PAPVRN	2	0	2	PASTKC PAPTLY	0	0	0	0	0	6	0	6	PALFXR PAMANU PALKER PAMIUG PADWVR PATYDC	0	0	0	0	0	1	8	8
LINGO2	LINGO2	chr9	27948083	29212998	-	8	0	8	0	6	6	12	2	3	5	10	0	0	0	0	PASWVY PAPSEI PASYPX PASUCB PASWYR PAPKXS PASWIJ PASUYG	PARGDJ PATDXC PARAHE PATGWT PAPKXS PASUYG	3	0	3	PASJYB PASUCB PARACS	0	0	0	0	0	4	1	5	PAKRPD PALURF PADNFT PATRMB	PAUKLK	0	0	0	0	1	8	14
FOXR1	FOXR1	chr11	118842416	118851995	+	4	0	4	0	0	0	4	1	0	2	0	2	1	0	0	PASSWW PARBAJ PASUCB PASPBZ	0	2	3	3	PASPBZ PASSWW	PARBAJ PASPBZ PASSWW	0	0	0	0	0	4	4	0	PAKYAZ PAIXVH PANSIC PAIXRK	0	0	0	0	2	7	4
SLC9A7P1	ANKS1B	chr12	98847617	98850923	-	0	4	4	3	0	3	7	2	0	1	4	0	0	0	0	PAPTAN PASUCB PASEGA PASWYR	PAPEAV PASVRU PARDUJ	0	3	3	0	PAPTLD PARACS PASVRU	0	0	0	0	0	4	4	0	PARXXC PASKSR PALBFV PATVHB	0	0	0	0	1	7	9
APAF1	ANKS1B	chr12	99039077	99129211	+	2	2	4	0	0	0	4	1	0	1	2	0	0	0	0	PARDUJ PASEGA PAPTAN PANLET	0	3	3	5	PARACS PASEGA PASSRS	PASYPX PASVRU PARACS	0	0	0	0	0	2	2	0	PATVHB PAKPLH	0	0	0	0	1	7	8
PLXDC1	PLXDC1	chr17	37219555	37307902	-	2	0	2	0	0	0	2	0	1	0	1	0	0	0	0	PASJYB PAISNS	0	2	3	4	PATFXV PASJYB	PAISNS PARXLM PASJYB	0	0	0	0	2	3	4	PALPGL PASJYB	PADKRU PALBSI PASJYB	0	0	0	0	1	7	4
MAML3	MAML3	chr4	140637544	141075233	-	3	0	3	1	1	2	4	2	0	2	2	0	0	0	0	PAPUTN PARKGJ PARSEA	PAPUTN PASATK	4	1	4	PARBLH PARKGJ PASATK PARSEA	PARKGJ	0	0	0	0	3	1	4	PARSEA PALJVX PAMVLG	PARYVD	0	0	0	0	3	7	5
SLC12A7	TERT	chr5	1050488	1112172	-	4	0	4	5	2	5	8	1	3	50	2	1	5	0	0	PATBMM PAPUTN PARNCW PARNTS	PAPUTN PARXLM PARACM PAMNLH PATDXC	2	5	6	PATBMM PAPUTN	PAPSKM PARXLM PAMNLH PANNMS PAPUTN	0	0	0	0	0	1	1	0	PADIEY	0	0	0	0	4	7	10
PACS1	PACS1	chr11	65837823	66012218	+	2	1	3	0	0	0	3	1	1	1	1	0	0	0	0	PAPTAN PARSEA PASPER	0	2	1	3	PAPTAN PARSEA	PARFWB	0	0	0	0	3	0	3	PATYBZ PALTXM PAKFVB	0	0	0	0	0	2	6	4
TMPO	ANKS1B	chr12	98909350	98944157	+	5	2	7	0	0	0	7	2	0	1	4	0	0	0	0	PASVRU PARDUJ PAPEAV PASUCB PASWYR PAPTAN PASEGA	0	3	3	3	PAPTLD PARACS PASVRU	PAPTLD PARACS PASVRU	0	0	0	0	3	3	3	PARXXC PASKSR PALBFV	PARXXC PASKSR PALBFV	0	0	0	0	1	6	9
LINC00910	LINC00910	chr17	41447212	41466266	-	8	0	8	4	0	4	12	1	3	11	0	0	0	0	0	PAPSKM PARDCK PASWVY PAPVFD PARXLM PARIRD PAREGK PARZHA	PANLET PAPTIP PATGWT PASNZU	1	2	2	PARXLM	PATGWT PARXLM	0	0	0	0	0	4	4	0	PADNNX PACRYY PADLTD PAMCJD	0	0	0	0	2	6	12
RDH14	MYCN	chr2	18735988	18741959	-	0	3	3	2	0	2	3	6	0	16	5	2	3	0	0	PAPZYP PAPSEI PARBLH	PAPSEI PAPZYP	0	2	2	0	PAPZYP PAPSEI	3	PAPSEI PAPZYP PARNEE	0	0	0	0	0	0	0	3	PAKHHB PAMZGT PANFVP	0	0	2	6	4
SLIT3	SLIT3	chr5	168088737	168728133	-	5	0	5	2	1	3	7	1	0	1	3	0	4	0	0	PASSRS PARAMT PATBMM PAPTLD PAPEAV	PATBMM PASWIJ PALXTB	4	1	5	PATBMM PAPTLD PAPSKM PAPEAV	PASWIJ	0	0	0	0	1	0	1	PARYVD	0	0	0	0	0	4	6	8
CDKN2A	CDKN2A	chr9	21967750	21994490	-	0	3	3	0	0	0	3	3	0	0	0	0	0	0	0	PASCKI PASLGS PARKGJ	0	0	2	2	0	PASLGS PARKGJ	0	0	3	PARKGJ PASLGS PASXHE	0	1	1	0	PAPEVV	0	0	2	PAAPFA PADMYD	2	6	4
CDKN2B	CDKN2A	chr9	22002901	22009312	-	0	3	3	0	0	0	3	3	0	0	0	0	0	0	0	PASCKI PASLGS PARKGJ	0	0	2	2	0	PASLGS PARKGJ	0	0	3	PARKGJ PASLGS PASXHE	0	1	1	0	PAPEVV	0	0	2	PAAPFA PADMYD	2	6	4
CAMTA1	CAMTA1	chr1	6845383	7829766	+	3	0	3	0	1	1	4	0	1	3	1	0	0	0	0	PASAZJ PAPUTN PASLGS	PASATK	1	0	1	PASLGS	0	0	0	0	0	4	0	4	PANWBG PALIDE PAIXNC PALUDH	0	0	0	0	0	1	5	4
NBEA	NBEA	chr13	35516423	36246874	+	4	0	4	0	0	0	4	1	0	1	2	0	0	0	0	PAPWUC PAPVEB PASUCB PARDYU	0	2	0	2	PAPVEB PARIRD	0	0	0	0	0	3	0	3	PATLCM PAIRHS PATMFL	0	0	0	0	0	1	5	5
MARCH11	MARCH11	chr5	16067473	16179897	-	2	0	2	0	0	0	2	1	0	2	0	0	0	0	0	PARIKF PASUCB	0	2	1	3	PARXLM PARIKF	PARVME	0	0	0	0	0	3	3	0	PARVME PALUVT PAKCKA	0	0	0	0	1	5	4
SLC6A3	TERT	chr5	1392904	1445543	-	3	0	3	2	0	2	4	4	1	0	1	0	4	0	0	PAPVXS PARXLM PARNTS	PAPVXS PAPSKM	2	2	3	PARXLM PAPVXS	PAPVXS PAPSKM	0	0	0	0	2	1	2	PAPSKM PASGKP	PASGKP	0	0	0	0	3	4	4
MAGI2	MAGI2	chr7	77646373	79082890	-	3	0	3	0	1	1	4	1	1	0	2	0	0	0	0	PASUYG PAPVXS PASGUT	PARMTT	1	0	1	PASGUT	0	0	0	0	0	3	0	3	PACSAS PADKGF PADLBE	0	0	0	0	0	1	4	4
RERE	RERE	chr1	8412463	8877699	-	2	0	2	2	1	3	4	1	1	0	1	0	2	0	0	PASCUF PARYNK	PAKZRH PASXHE PARYNK	2	2	3	PASLGS PASCUF	PASXHE PASCUF	0	0	0	0	0	0	0	0	0	0	0	0	0	2	3	5
ZFHX3	ZFHX3	chr16	72816783	73092534	-	3	0	3	0	8	8	11	8	0	2	2	2	0	0	0	PARHYL PASXIE PAPSEI	PASUYG PASWYR PARSEA PARVME PARMTT PARDYU PARDUJ PAPZYP	1	0	1	PARHYL	0	0	0	0	0	2	0	2	PADIBM PAKMRM	0	0	0	0	0	1	3	11
LSAMP	LSAMP	chr3	115521209	116164385	-	4	0	4	0	1	1	5	2	1	0	2	0	0	0	0	PARSEA PATHVK PARABN PARIKF	PASRFS	3	2	3	PARIKF PATHVK PAMNLH	PAMNLH PATHVK	0	0	0	0	1	0	1	PARIKF	0	0	0	0	0	2	3	6
CCSER1	CCSER1	chr4	91048683	92523370	+	3	0	3	0	2	2	5	2	0	2	1	0	1	0	0	PASWYR PATEPF PATGLU	PASPBZ PARNTS	1	0	1	PATEPF	0	0	0	0	0	2	0	2	PATLCM PAMUTD	0	0	0	0	0	1	3	5
ANK2	ANK2	chr4	113739238	114304896	+	4	0	4	0	2	2	5	4	0	3	0	0	0	0	0	PAPUTN PARZIP PARFWB PAPVFD	PASFGG PARZIP	1	1	2	PAPVFD	PASWIJ	0	0	0	0	1	1	1	PAUAIN	PAUAIN	0	0	0	0	1	3	6
TENM3	TENM3	chr4	183164583	183724177	+	6	0	6	3	1	3	8	3	1	4	4	1	0	0	0	PANRVJ PASNPG PATDXC PASKJX PARDIW PATFCY	PAPTDH PASUYG PARDIW	1	1	2	PANRVJ	PAPTDH	0	0	0	0	1	1	1	PARURB	PARURB	0	0	0	0	2	3	8
CTNND2	CTNND2	chr5	10971951	11904155	-	4	0	4	0	3	3	7	2	0	2	3	0	3	0	0	PARVME PAPSKM PASNEF PARXLM	PARNCW PASGAP PAPVRN	3	1	3	PASNEF PATBMM PARXLM	PATBMM	0	0	0	0	0	0	0	0	0	0	0	0	0	2	3	8
CDH18	CDH18	chr5	19473139	20575982	-	5	0	5	1	1	2	6	4	5	44	3	0	5	0	0	PARNCW PAPTLD PAPUTN PAMNLH PAPSKM	PATBMM PAPUTN	2	1	2	PARNCW PAPUTN	PAPUTN	0	0	0	0	2	0	2	PALPKZ PAPUTN	0	0	0	0	0	2	3	6
KCNIP1	KCNIP1	chr5	169780490	170163636	+	4	0	4	0	1	1	5	1	0	2	1	0	4	0	0	PAPEAV PATBMM PAPTLD PASNEF	PARAHE	2	0	2	PATBMM PAPTLD	0	0	0	0	0	1	0	1	PATNPW	0	0	0	0	0	2	3	5
KHDRBS2	KHDRBS2	chr6	62389864	62996132	-	1	0	1	0	1	1	2	0	0	0	1	0	1	0	0	PARDCK	PATHVK	3	0	3	PASNZU PATHVK PASSRS	0	0	0	0	0	0	0	0	0	0	0	0	0	0	1	3	4
PTPRN2	PTPRN2	chr7	157331745	158380494	-	3	0	3	0	1	1	4	2	1	0	1	0	0	0	0	PARYNK PARAHE PARUXY	PARGDJ	1	0	1	PARYNK	0	0	0	0	0	2	0	2	PADKNE PAIXNC	0	0	0	0	0	1	3	4
ENOX1	ENOX1	chr13	43787268	44361116	-	3	0	3	0	1	1	4	0	0	3	3	0	0	0	0	PARAHE PAPVFD PASRFS	PALXTB	1	0	1	PARAHE	0	0	0	0	0	1	0	1	PALRCT	0	0	0	0	0	1	2	4
RBFOX1	RBFOX1	chr16	6069131	7763340	+	3	0	3	0	2	2	4	0	1	1	1	0	2	0	0	PAPTLD PASUCB PARAMT	PARKGJ PASUCB	1	0	1	PAPTLD	0	0	0	0	0	2	0	2	PAPTLD PAKUJM	0	0	0	0	0	1	2	4
RBMS3	RBMS3	chr3	29322802	30051886	+	3	0	3	0	1	1	4	1	0	0	3	0	0	0	0	PASTKC PAPWUC PARDCK	PANNMS	1	0	1	PAPWUC	0	0	0	0	0	1	0	1	PAMCJD	0	0	0	0	0	1	2	4
ROBO1	ROBO1	chr3	78646387	79817059	-	3	0	3	0	0	0	3	1	2	0	0	0	0	0	0	PARABN PATDXC PARYNK	0	2	0	2	PARYNK PASCKI	0	0	0	0	0	0	0	0	0	0	0	0	0	0	1	2	4
ELMO1	ELMO1	chr7	36892510	37488929	-	3	0	3	0	1	1	4	0	2	0	2	0	0	0	0	PATGLU PASXIE PASYLD	PATEPF	2	0	2	PATGLU PASXIE	0	0	0	0	0	0	0	0	0	0	0	0	0	0	2	2	4
EPB41L4A	EPB41L4A	chr5	111478138	111755013	-	4	0	4	2	0	2	6	1	1	2	1	0	4	0	0	PASMDM PATBMM PAPTLD PASCUF	PARAMT PAPWUC	1	0	1	PATBMM	0	0	0	0	0	0	0	0	0	0	0	0	0	0	1	1	6
